# Supplementary material for: Protocol for a systematic review and meta-analysis assessing the effectiveness of deprescribing in falls prevention in older people
Source: PubMed Central journal article supplement — BMJ Open. 2021 Nov 3;11(11):e047190. doi: 10.1136/bmjopen-2020-047190 (PMC8572380; doi:10.1136/bmjopen-2020-047190), 2021-11-03
Supplement: bmjopen-2020-047190supp001.pdf [file bmjopen-2020-047190supp001.pdf]

## Appendix 1. Search strategy for Medline

1. inappropriate prescribing/ or exp medication errors/ or deprescriptions/ or exp drug prescriptions/ or exp drug utilization/
2. (deprescri\* or ((antidepress\* anti depress\* or antipsychotic\* or anti psychotic\* or medicine or medication or drug? or frid? or polypharmac\*) adj2 withdrawal) or ((dose or dosage) adj3 reduc\*) or ((discontinu\* or problem\* or alternative?) adj3 (antidepress\* anti depress\* or antipsychotic\* or anti psychotic\* or medicine or medication or drug? or frid? or polypharmac\*)) or (chang\* adj5 (antidepress\* anti depress\* or antipsychotic\* or anti psychotic\* or medicine or medication or drug? or frid? or polypharmac\*)) or ((polypharmac\* or medication) adj2 (risk? or review)) or ((polypharmac\* or medication) adj2 management) or prescribing problem? or overprescri\* or underprescri\* or under prescri\* or over prescri\* or (frid? and adverse) or medication errors or inappropriate prescri\* or (appropriat\* adj2 (prescri\* or medicine or medication)) or harmful medic\* or medication reconciliation).ab,kf,ti
3. or/1-2 [deprescription]
4. accidental falls/
5. (fall? or fell or falling or fallen or faller or stumble? or stumbling or stumbles or slip or slips or slipping or slipped or trip or tripped or physical self maintenance or ambulation or ambulatory).ab,kf,. ti.
6. "Outcome Assessment, Health Care"/
7. (assess\* and health care).mp.
8. or/4-7 [Falls | health care assessment]
9. Geriatric assessment/ or frail elderly/ or exp aged/ or middle aged/ or exp nursing homes/ or "homes for the aged"/ or exp aging/
10. (older person? or older patient? or seniors or senior citiz\* or elder or elders or elderly or geriatric\* or frailty or postmenopausal women or community-dwelling or nursing home? or resident\* or old\* people or old\* person? or old\* patient? or old\* client? or old\* adult? or older m?n or older wom?n).ab,kf,ti.
11. (geriatr\* or age or aging or elderl\*).in,jw.
12. or/9-11 [Geriatric]
13. and/3,8,12
14. (Beers criteria or Stuck criteria or Beers-Fick criteria or McLeod criteria or Zhan criteria or Rancourt criteria or Lindblad criteria or HEDIS or "Healthcare Effectiveness Data and Information Set" or Japanese Beers or French criteria or Thailand criteria or STOPP or "Screening Tool of Older Person's Prescriptions" or NORGEP or "Norwegian General Practice criteria" or Italian Criteria or Priscus or Korean criteria or Taiwan criteria or Austrian Criteria or Australian Prescribing Indicators Tool or APIT or New Mexico criteria or Czech National criteria or Clyne criteria or Castillo-Paramo criteria or FORTA or "Fit fOR The Aged list" or Galan-Retamal criteria or "EU 7 PIM list" or "European list of potentially inappropriate medications for older people" or Kim criteria or GheOP3S or "Ghent Older People's Prescriptions community Pharmacy Screening" or Chilean criteria or Mazhar criteria or Khodyakov criteria or "Systematic Tool to Reduce Inappropriate Prescribing" or (STRIP adj2 criteria) or Medication Appropriateness Index or MAI or (Assessment of Underutilization adj2 index) or WWADR Profile or West Wales ADR or "lawton and brody").mp [specific tools | outcomes]
15. 13 or 14
16. (randomized or randomly or double blind\* or controlled trial? or controlled clinical trial?).ab,kf,ti.
17. (randomized controlled trial or controlled clinical trial).pt.
18. trial.ti.
19. or/16-18 [RCT's sensitive]
20. 15 and 19
